# Supplementary material for: Mesoporous carbon encapsulated zinc oxide nanorods derived from plant species ‘Argyreia sharadchandrajii’ for live cell imaging of drug delivery and multimodal bioactivities
Source: Royal Society of Chemistry journal article supplement (doi:10.1039/d3nj00071k), 2023-01-01
Supplement: d3nj00071k4.pdf [file d3nj00071k4.pdf]

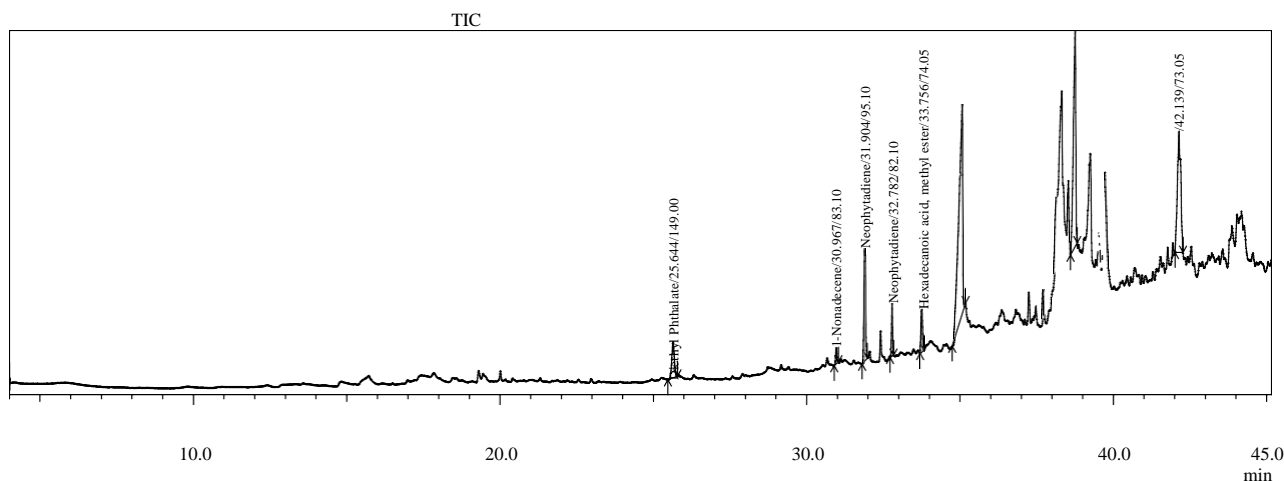

Peak Report TIC

| Peak# | Name                            | R.Time | Area      | Area%  | Height    | Height% | A/H  | Base m/z |
|-------|---------------------------------|--------|-----------|--------|-----------|---------|------|----------|
| 1     | Diethyl Phthalate               | 25.644 | 28750001  | 4.49   | 5027110   | 4.46    | 5.72 | 149.00   |
| 2     | 1-Nonadecene                    | 30.967 | 6517529   | 1.02   | 2223225   | 1.97    | 2.93 | 83.10    |
| 3     | Neophytadiene                   | 31.904 | 42863553  | 6.69   | 15695125  | 13.91   | 2.73 | 95.10    |
| 4     | Neophytadiene                   | 32.782 | 18715910  | 2.92   | 7356955   | 6.52    | 2.54 | 82.10    |
| 5     | Hexadecanoic acid, methyl ester | 33.756 | 16751514  | 2.62   | 6030900   | 5.35    | 2.78 | 74.05    |
| 6     | n-Hexadecanoic acid             | 35.090 | 237071709 | 37.03  | 29214813  | 25.90   | 8.11 | 73.00    |
| 7     | Octadecanoic acid               | 38.753 | 160556605 | 25.08  | 30288474  | 26.85   | 5.30 | 57.05    |
| 8     |                                 | 42.139 | 129066279 | 20.16  | 16979250  | 15.05   | 7.60 | 73.05    |
|       |                                 |        | 640293100 | 100.00 | 112815852 | 100.00  |      |          |

Library

&lt;&lt; Target &gt;&gt;

Line#:1 R.Time:25.645(Scan#:4330) MassPeaks:330  
RawMode:Averaged 25.640-25.650(4329-4331) BasePeak:149.00(2099563)  
BG Mode:Calc. from Peak Group 1 - Event 1 Q3 Scan

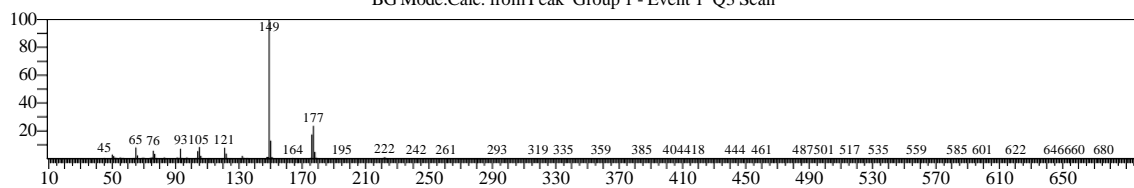

Hit#:1 Entry:85302 Library:NIST14.lib  
SI:95 Formula:C12H14O4 CAS:84-66-2 MolWeight:222 RetIndex:1639  
CompName:Diethyl Phthalate

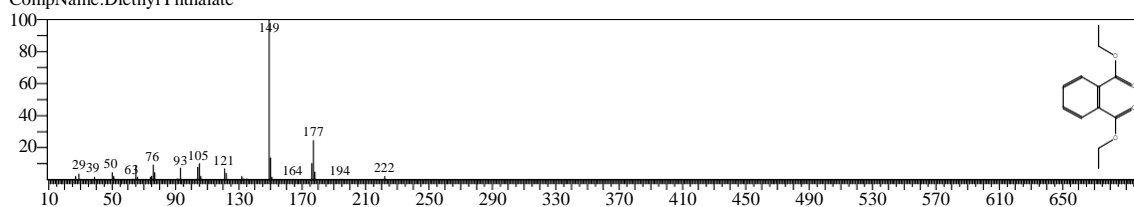

Hit#:2 Entry:85305 Library:NIST14.lib  
SI:95 Formula:C12H14O4 CAS:84-66-2 MolWeight:222 RetIndex:1639  
CompName:Diethyl Phthalate

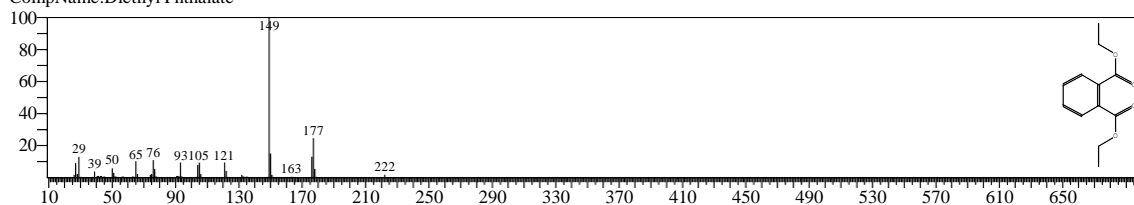

Hit#:3 Entry:85306 Library:NIST14.lib  
SI:95 Formula:C12H14O4 CAS:84-66-2 MolWeight:222 RetIndex:1639  
CompName:Diethyl Phthalate

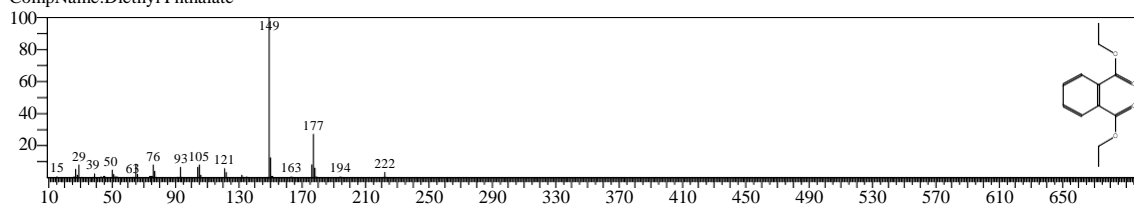

&lt;&lt; Target &gt;&gt;

Line#:2 R.Time:30.965(Scan#:5394) MassPeaks:367  
 RawMode:Averaged 30.960-30.970(5393-5395) BasePeak:83.10(201980)  
 BG Mode:Calc. from Peak Group 1 - Event 1 Q3 Scan

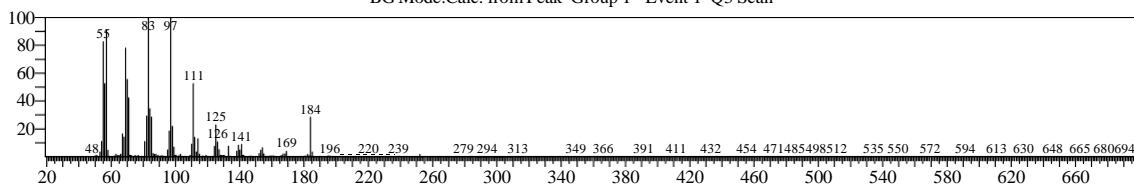

Hit#:1 Entry:126962 Library:NIST14.lib  
 SI:94 Formula:C19H38 CAS:18435-45-5 MolWeight:266 RetIndex:1900  
 CompName:1-Nonadecene

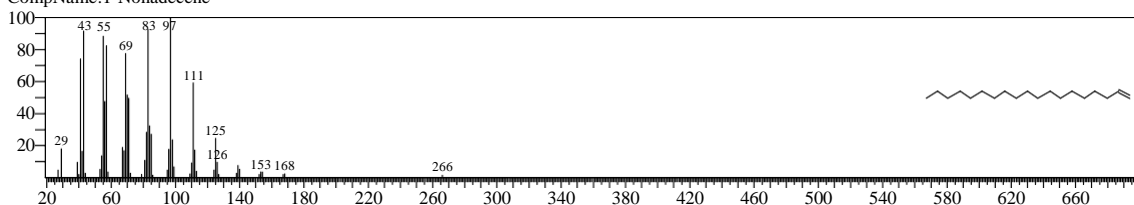

Hit#:2 Entry:184717 Library:NIST14.lib  
 SI:93 Formula:C22H46O CAS:661-19-8 MolWeight:326 RetIndex:2451  
 CompName:Behenic alcohol

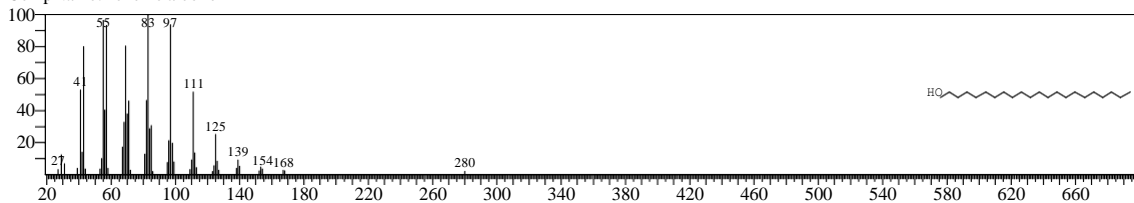

Hit#:3 Entry:144494 Library:NIST14.lib  
 SI:93 Formula:C19H40O CAS:1454-84-8 MolWeight:284 RetIndex:2153  
 CompName:n-Nonadecanol-1

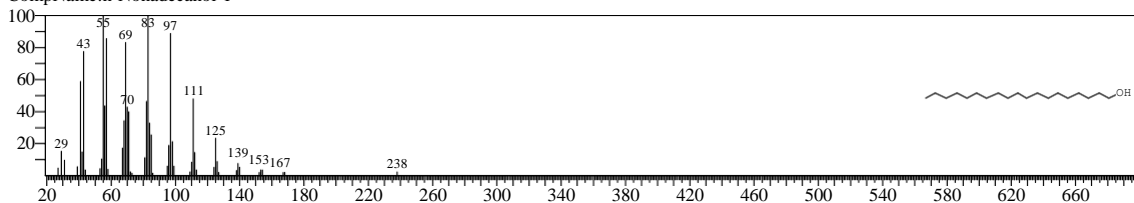

&lt;&lt; Target &gt;&gt;

Line#:3 R.Time:31.905(Scan#:5582) MassPeaks:367  
 RawMode:Averaged 31.900-31.910(5581-5583) BasePeak:95.10(1403218)  
 BG Mode:Calc. from Peak Group 1 - Event 1 Q3 Scan

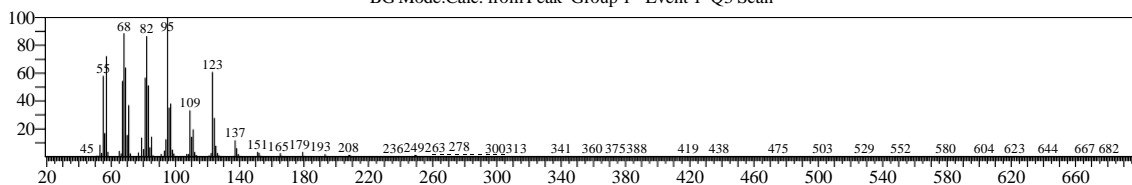

Hit#:1 Entry:138602 Library:NIST14.lib  
 SI:96 Formula:C20H38 CAS:504-96-1 MolWeight:278 RetIndex:0  
 CompName:Neophytadiene

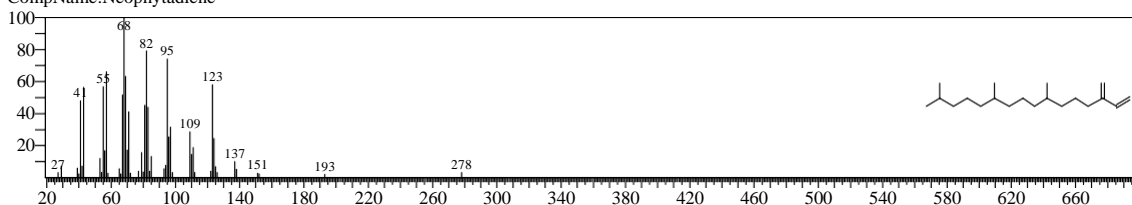

Hit#:2 Entry:195632 Library:NIST14.lib  
 SI:93 Formula:C22H42O2 CAS:0-00-0 MolWeight:338 RetIndex:2168  
 CompName:Phytol, acetate

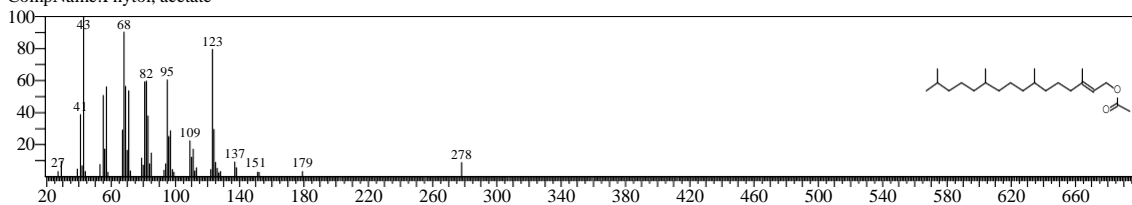

Hit#:3 Entry:155915 Library:NIST14.lib  
 SI:92 Formula:C20H40O CAS:102608-53-7 MolWeight:296 RetIndex:2045  
 CompName:3,7,11,15-Tetramethyl-2-hexadecen-1-ol

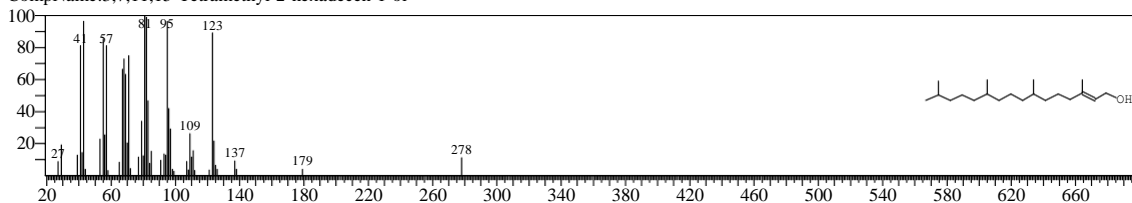

&lt;&lt; Target &gt;&gt;

Line#:4 R.Time:32.780(Scan#:5757) MassPeaks:389  
 RawMode:Averaged 32.775-32.785(5756-5758) BasePeak:82.10(639763)  
 BG Mode:Calc. from Peak Group 1 - Event 1 Q3 Scan

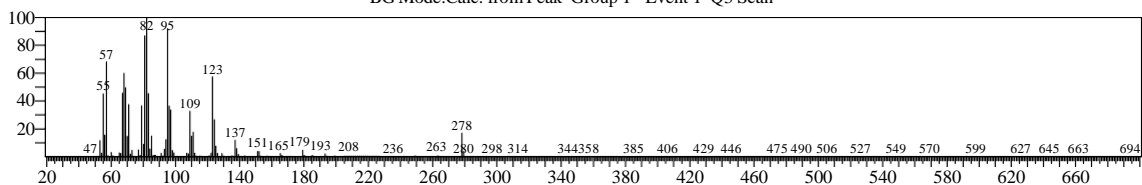

Hit#:1 Entry:138602 Library:NIST14.lib  
 SI:92 Formula:C20H38 CAS:504-96-1 MolWeight:278 RetIndex:0  
 CompName:Neophytadiene

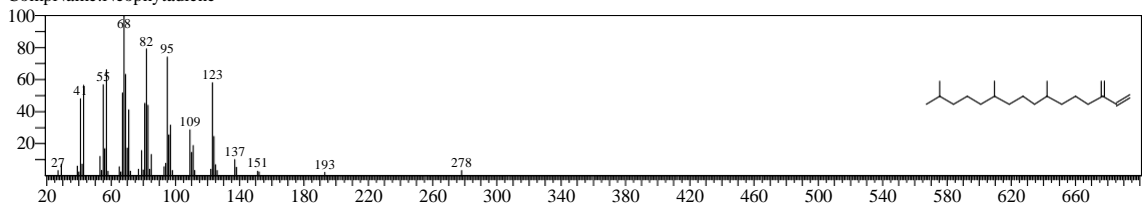

Hit#:2 Entry:155915 Library:NIST14.lib  
 SI:92 Formula:C20H40O CAS:102608-53-7 MolWeight:296 RetIndex:2045  
 CompName:3,7,11,15-Tetramethyl-2-hexadecen-1-ol

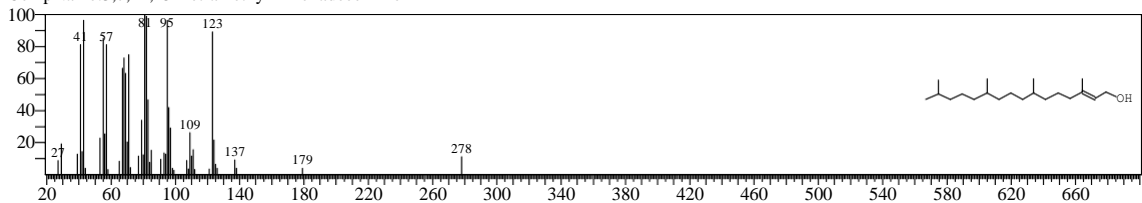

Hit#:3 Entry:195632 Library:NIST14.lib  
 SI:90 Formula:C22H42O2 CAS:0-00-0 MolWeight:338 RetIndex:2168  
 CompName:Phytol, acetate

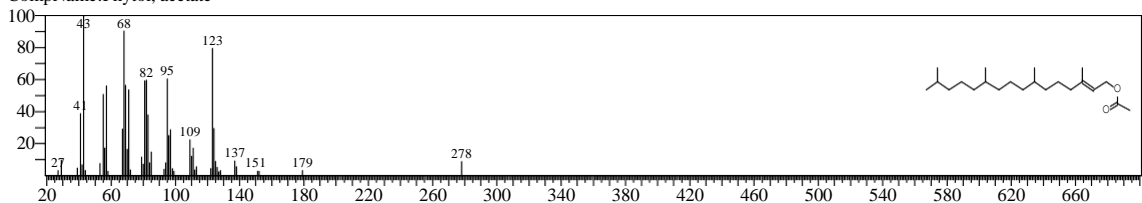

&lt;&lt; Target &gt;&gt;

Line#:5 R.Time:33.755(Scan#:5952) MassPeaks:402  
RawMode:Averaged 33.750-33.760(5951-5953) BasePeak:74.05(1378954)  
BG Mode:Calc. from Peak Group 1 - Event 1 Q3 Scan

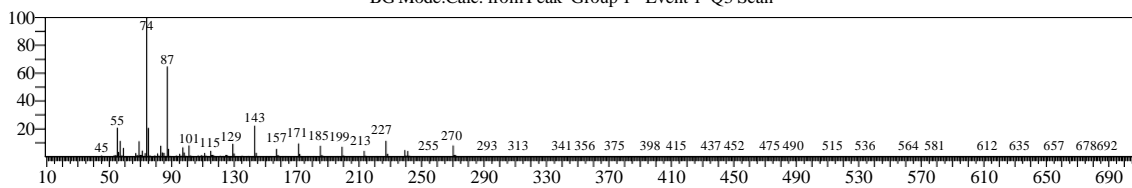

Hit#:1 Entry:130897 Library:NIST14.lib  
SI:95 Formula:C17H34O2 CAS:112-39-0 MolWeight:270 RetIndex:1878  
CompName:Hexadecanoic acid, methyl ester

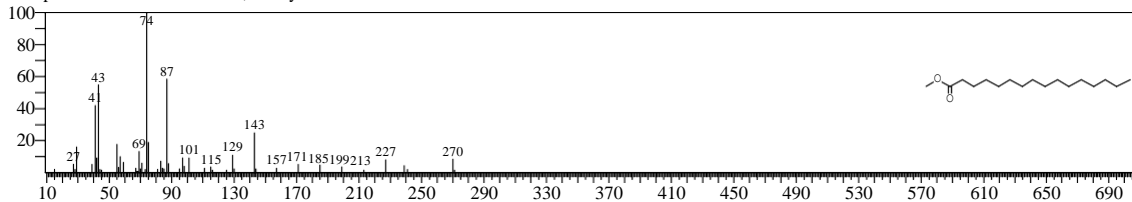

Hit#:2 Entry:130900 Library:NIST14.lib  
SI:95 Formula:C17H34O2 CAS:112-39-0 MolWeight:270 RetIndex:1878  
CompName:Hexadecanoic acid, methyl ester

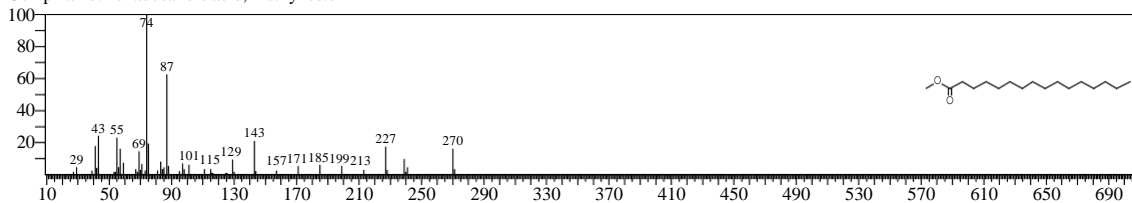

Hit#:3 Entry:130894 Library:NIST14.lib  
SI:95 Formula:C17H34O2 CAS:112-39-0 MolWeight:270 RetIndex:1878  
CompName:Hexadecanoic acid, methyl ester

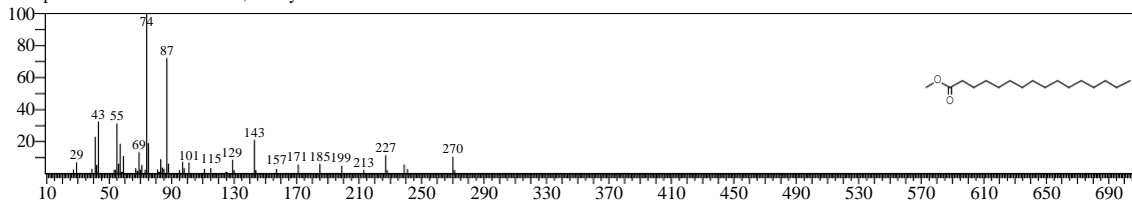

&lt;&lt; Target &gt;&gt;

Line#:6 R.Time:35.090(Scan#:6219) MassPeaks:474  
 RawMode:Averaged 35.085-35.095(6218-6220) BasePeak:73.00(2610261)  
 BG Mode:Calc. from Peak Group 1 - Event 1 Q3 Scan

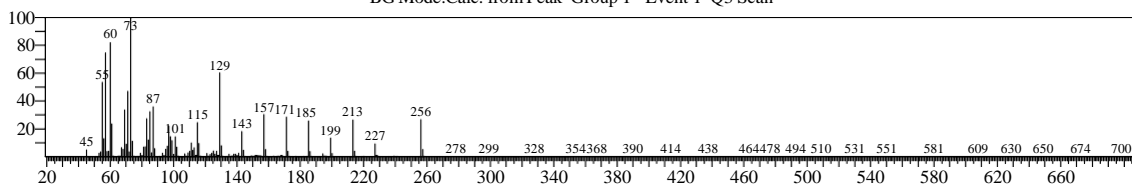

Hit#:1 Entry:117567 Library:NIST14.lib  
 SI:94 Formula:C16H32O2 CAS:57-10-3 MolWeight:256 RetIndex:1968  
 CompName:n-Hexadecanoic acid

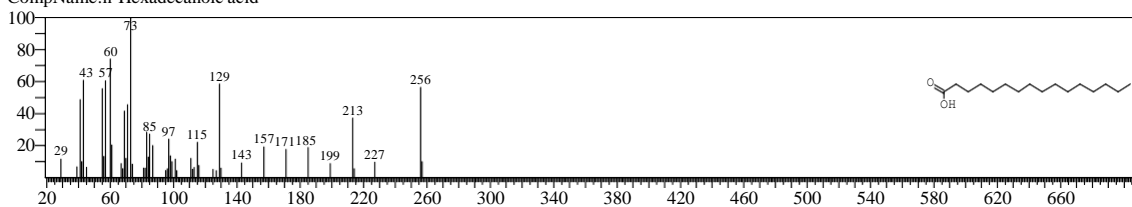

Hit#:2 Entry:117566 Library:NIST14.lib  
 SI:91 Formula:C16H32O2 CAS:57-10-3 MolWeight:256 RetIndex:1968  
 CompName:n-Hexadecanoic acid

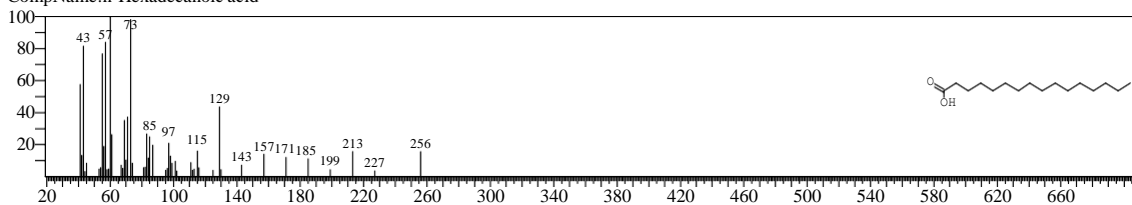

Hit#:3 Entry:274388 Library:NIST14.lib  
 SI:90 Formula:C38H68O8 CAS:28474-90-0 MolWeight:652 RetIndex:4765  
 CompName:l-(+)-Ascorbic acid 2,6-dihexadecanoate

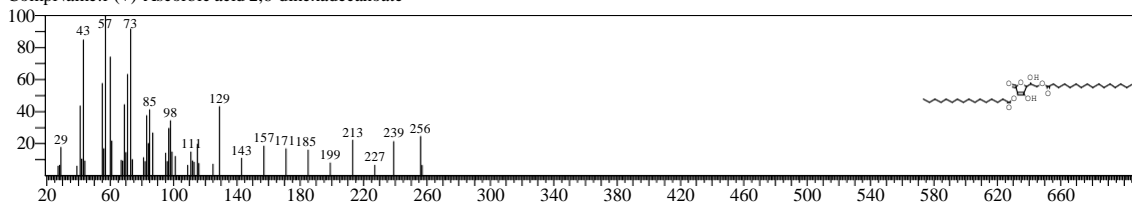

&lt;&lt; Target &gt;&gt;

Line#:7 R.Time:38.755(Scan#:6952) MassPeaks:480  
RawMode:Averaged 38.750-38.760(6951-6953) BasePeak:57.05(2451415)  
BG Mode:Calc. from Peak Group 1 - Event 1 Q3 Scan

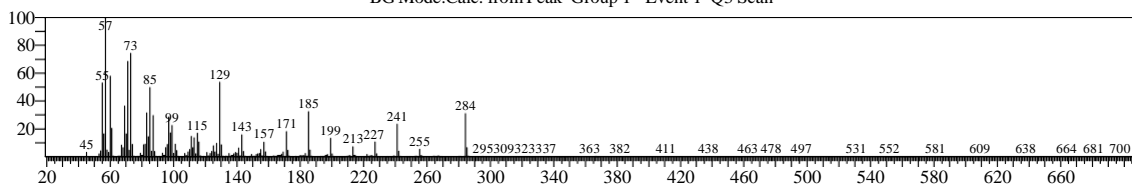

Hit#:1 Entry:144389 Library:NIST14.lib  
SI:90 Formula:C18H36O2 CAS:57-11-4 MolWeight:284 RetIndex:2167  
CompName:Octadecanoic acid

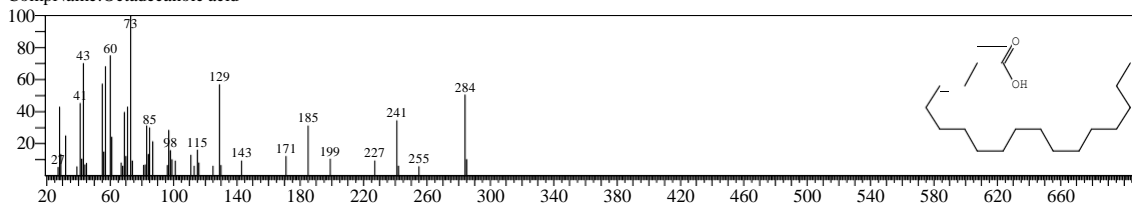

Hit#:2 Entry:144385 Library:NIST14.lib  
SI:90 Formula:C18H36O2 CAS:57-11-4 MolWeight:284 RetIndex:2167  
CompName:Octadecanoic acid

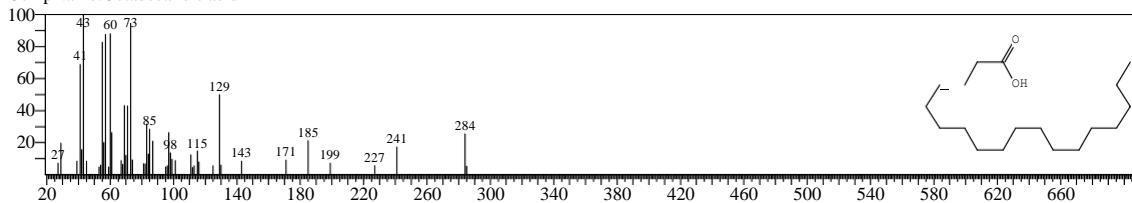

Hit#:3 Entry:144388 Library:NIST14.lib  
SI:89 Formula:C18H36O2 CAS:57-11-4 MolWeight:284 RetIndex:2167  
CompName:Octadecanoic acid

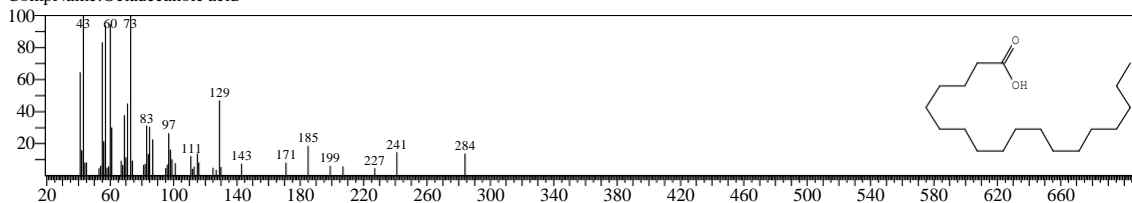



<< Target >>  
Line#:8 R.Time:42.140(Scan#:7629) MassPeaks:439  
RawMode:Averaged 42.135-42.145(7628-7630) BasePeak:73.05(3238213)  
BG Mode:Calc. from Peak Group 1 - Event 1 Q3 Scan

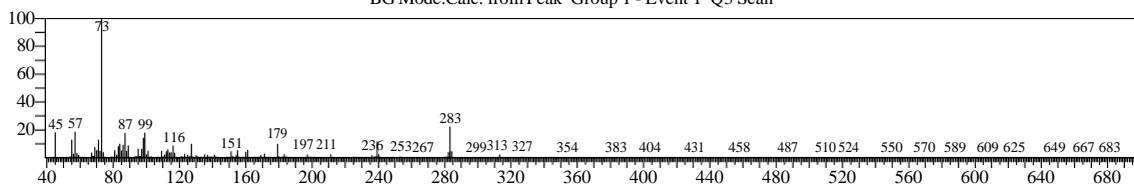

No hit compound
